# Supplementary material
Source: PubMed Central journal article supplement (PMC3032058)
Supplement: mmc1.pdf [file mmc1.pdf]

## **Supplemental Information**

### **Dominant-Negative Mutations in $\alpha$ -II Spectrin Cause West Syndrome with Severe Cerebral Hypomyelination, Spastic Quadriplegia, and Developmental Delay**

Hiroto Saito, Jun Tohyama, Tatsuro Kumada, Kiyoshi Egawa, Keisuke Hamada, Ippei Okada, Takeshi Mizuguchi, Hitoshi Osaka, Rie Miyata, Tomonori Furukawa, Kazuhiro Haginoya, Hideki Hoshino, Tomohide Goto, Yasuo Hachiya, Takanori Yamagata, Shinji Saitoh, Toshiro Nagai, Kiyomi Nishiyama, Akira Nishimura, Noriko Miyake, Masayuki Komada, Kenji Hayashi, Syu-ichi Hirai, Kazuhiro Ogata, Mitsuhiro Kato, Atsuo Fukuda, and Naomichi Matsumoto

#### **Outline**

1. Supplemental Figures 2
2. Supplemental Tables 3

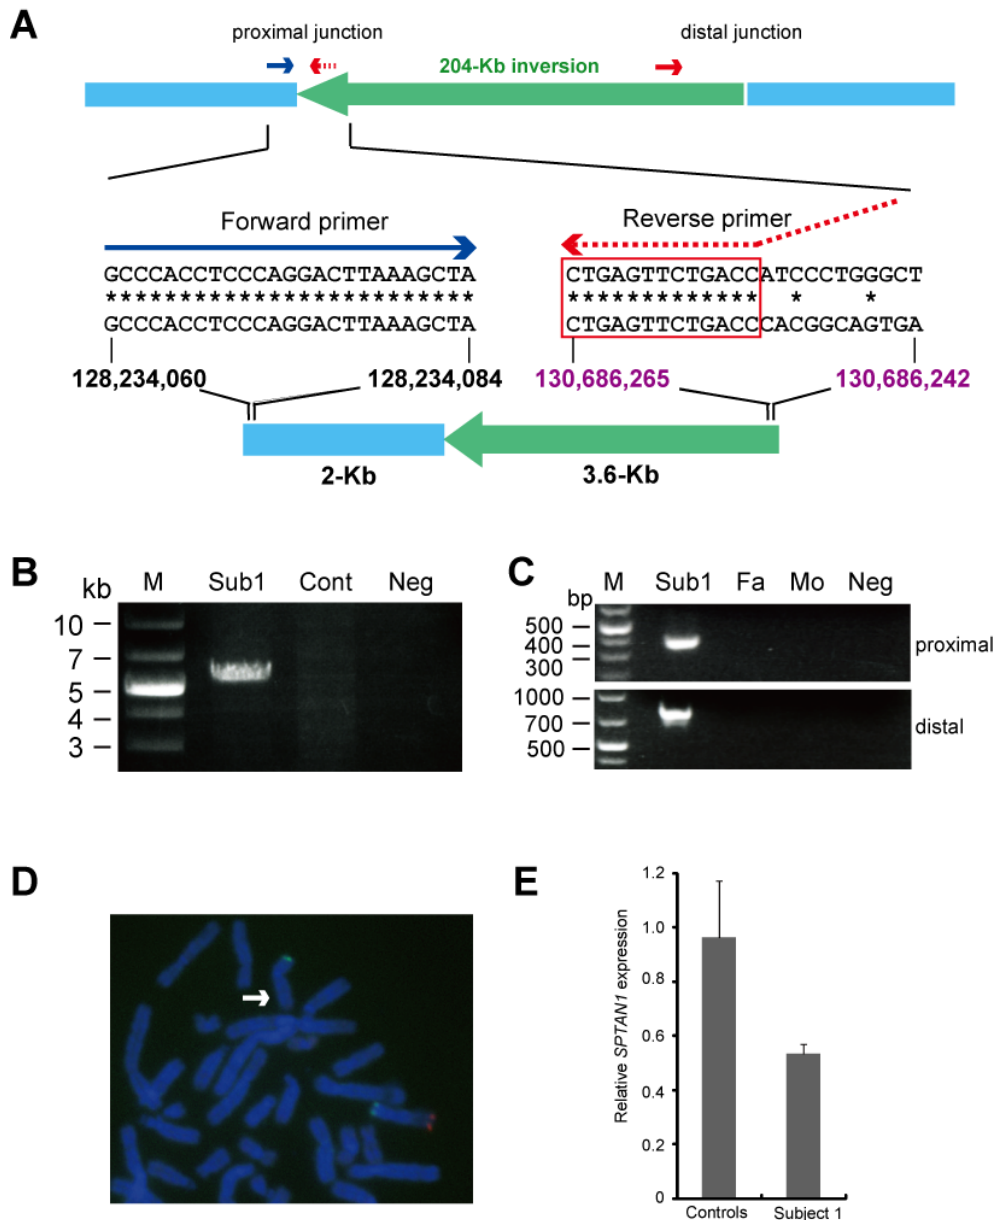

**Figure S1. Genomic rearrangements at 9q33.3-q34.11 in subject 1.** (A) Deletion junctions were narrowed-down by GeneChip Human Mapping 250K NspI analysis (Affymetrix), which was performed and analysed as previously described.<sup>1</sup> The proximal and distal junctions should map between chr 9:128,205,955 and 128,245,900 (40 kb interval) [UCSC genome browser coordinate (version Mar. 2006)], and between 130,402,182 and 130,493,941 (91.7 kb interval), respectively. Long PCR was performed in a 15  $\mu$ l volume, containing 100 ng genomic DNA, 1 $\times$  PCR Buffer for KOD FX, 0.4 mM each dNTP, 0.3  $\mu$ M each primer, and 0.3 U KOD FX polymerase (Toyobo, Osaka, Japan). Position and sequences of primers used for cloning of the proximal break point was indicated (upper). An unexpected 204-kb inversion and intact genomic regions are shown in green arrow and sky blue, respectively. The forward primer is shown by a blue

arrow. The reverse primer was initially designed to anneal to the position of the red solid arrow, but it accidentally annealed to the position of the red dashed arrow. Close-up view of the proximal breakpoint is also shown (lower). Two aligned nucleotide sequences show primer (upper) and chromosome 9 (lower) sequences with asterisks indicating identical nucleotides between them. Genomic positions of chromosome 9 are according to the UCSC genome browser coordinates (version Mar. 2006). In the reverse primer (red dashed arrow) originally designed without any supposition of the inversion, 13-bp sequence of the 3' side was accidentally matched to the 3.6 kb distal region from the proximal breakpoint in an inverted direction (red box), allowing PCR-amplification. The distal deletion junction fragment (also including another breakpoint of the inversion) was amplified using primers, Forward: 5'-TGAGGTCATCCTGCAAAGTGCGTAT-3' and Reverse: 5'-GAGCCAGGAGTTGGCTGACCTTATC-3' (11.9 kb amplicon). (B) PCR with two primers shown in (A) successfully amplified a 5.6 kb fragment using genomic DNA of subject 1 as a template. Sub1, subject 1; Cont, control DNA, Neg, negative control (no template DNA). (C) Breakpoint-specific PCR analysis of the family of subject 1. Primers specific to proximal (Forward: 5'-AACCCTCACCTGTGACCCAGTCATT-3', Reverse, 5'-TGTTTGAGTTGCTGATTCACAGTTTGCT-3', upper panel) and distal (Forward, 5'-GGCCAGAGAAGTTTCTGAGCACCTG-3', Reverse, 5'-GAGCCAGGAGTTGGCTGACCTTATC-3', lower panel) breakpoints could successfully amplify 381- and 842-bp products, respectively, only from Subject 1 (Sub 1), indicating the genomic rearrangements occurred *de novo*. M, size marker; Fa, father; Mo, mother; Neg, negative control. (D) FISH images of two BAC clones on subject 1's chromosomes are depicted. While RP11-307I3 on the short arm of chromosome 9 (green) showed two signals as a marker of chromosome 9, RP11-589e16 which spans the entire *SPTANI* gene (red) showed only one signal, indicating heterozygous deletion of *SPTANI* in subject 1 (white arrow). (E) Relative mRNA levels of *SPTANI* in lymphoblastoid cells (LCLs) were determined by quantitative real-time RT-PCR using TaqMan Gene expression assays (Hs00162203\_m1 for *SPTANI* and Hs00357333\_g1 for  $\beta$ -actin as a control). Levels are shown for four controls and subject 1. Average of duplicated experiments is displayed as a gray bar with an error bar of the standard deviation. LCLs derived from subject 1 showed almost half the level of expression of *SPTANI* mRNA compared with that of four normal control LCLs.

1. Saitsu, H., Kurosawa, K., Kawara, H., Eguchi, M., Mizuguchi, T., Harada, N., Kaname, T., Kano, H., Miyake, N., Toda, T., et al. (2009). Characterization of the complex 7q21.3 rearrangement in a patient with bilateral split-foot malformation and hearing loss. *Am J Med Genet A* 149A, 1224-1230.

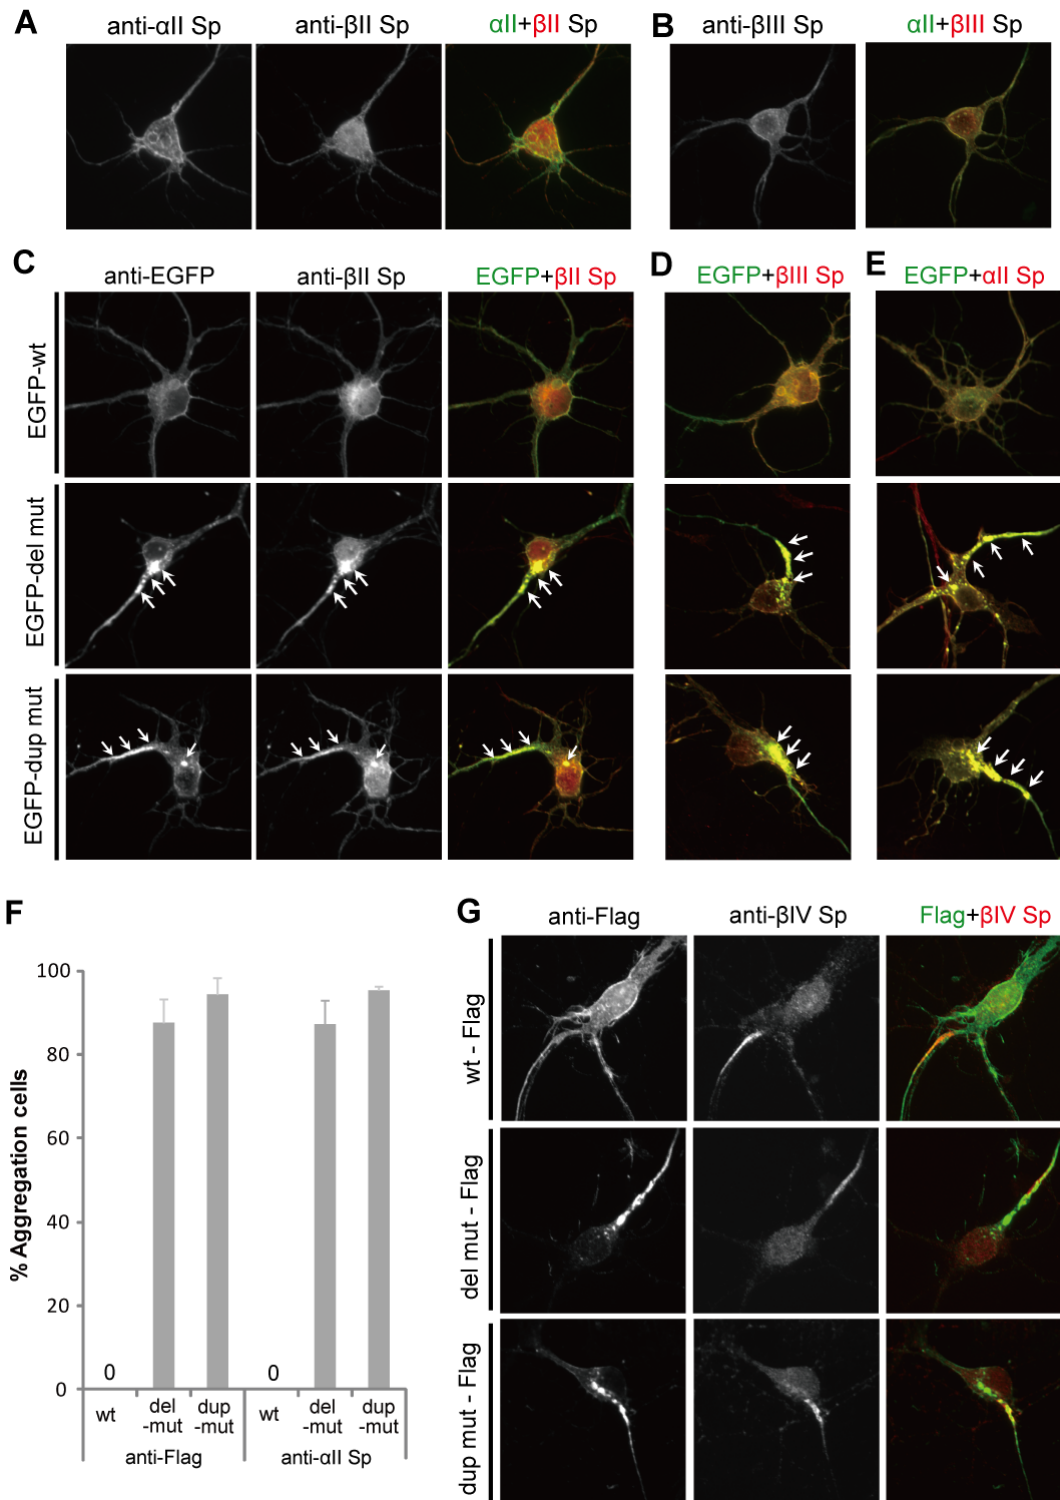

**Figure S2. Transient expression experiments of tagged  $\alpha$ -II spectrin.** Protein expression was evaluated at seven days of maturation in vitro (DIV) (A-F) and nine DIV (G). Double immunostaining of endogenous  $\alpha$ -II/ $\beta$ -II spectrins (A),  $\alpha$ -II/ $\beta$ -III spectrins

(B) in primary cultured cortical neurons. Expressions of  $\alpha$ -II,  $\beta$ -II, and  $\beta$ -III spectrins overlapped at the cell body and neurite. (C and D) Two mutant EGFP- $\alpha$ -II spectrins (EGFP-del mut and EGFP-dup mut) showed aggregation, predominantly in cell bodies and axons (arrows), and these aggregations were co-localized with  $\beta$ -II and  $\beta$ -III spectrins (middle and lower panels), while wild-type EGFP- $\alpha$ -II spectrin (EGFP-wt) did not show any such aggregation (upper panel). Aggregations were also detected with anti- $\alpha$ -II spectrin antibody (E), suggesting that endogenous  $\alpha$ -II spectrin was indeed involved in aggregation as an  $\alpha/\beta$  spectrin heterotetramer. (F) Cells showing aggregation were counted using nuclear EGFP as a transfection marker, expressed from the Flag-nucEGFP vector. While aggregations were never seen when wt  $\alpha$ -II spectrin was expressed, del mut and dup mut showed aggregation in approximately 87 % and 95 % of transfected cells, respectively (based on three independent experiments, n = 100 neurons in each experiment). The percentage of aggregation detection did not change between utilization of anti-Flag and anti- $\alpha$ -II spectrin antibody. Non-repeated measures using ANOVA followed by a Bonferroni post-test indicated that del mut and dup mut exhibited significant differences in number of cells having aggregation compared with wild-type, respectively (P<0.01). (G) Immunostaining against  $\beta$ -IV spectrin did not show its involvement in the mutant aggregation, in contrast to  $\beta$ -II and  $\beta$ -III spectrins. The following primary antibodies were used: mouse anti- $\alpha$ -II spectrin (1:400 dilution; clone D8B7; Abcam, Tokyo, Japan), mouse anti- $\beta$ -II spectrin (1:600 dilution; clone 42/B-spectrin II; BD Transduction laboratories, San Jose, CA), rabbit anti- $\beta$ -II spectrin (1:100 dilution; Abcam), rabbit anti- $\beta$ -III spectrin (1:400 dilution; Abcam), mouse anti-Flag M2 (1:1000 dilution; Sigma, Tokyo, Japan), chick anti- $\beta$ -IV spectrin (1: 400 dilution),<sup>1</sup> rabbit anti-GFP (1:2000 dilution; MBL, Nagoya, Japan), and chicken anti-GFP (1:2000 dilution; Aves labs, Tigard, OR).

1. Komada, M., and Soriano, P. (2002).  $\beta$ IV-spectrin regulates sodium channel clustering through ankyrin-G at axon initial segments and nodes of Ranvier. *J Cell Biol* 156, 337-348.

**Table S1. Summary of clinical features in individuals with *SPTANI* aberrations**

| Subject<br>Age<br>Sex       | <i>SPTANI</i><br>aberrations                                                | Initial<br>symptoms                    | Onset<br>of<br>spasms | Initial<br>EEG | Response to<br>therapy                          | Development                                                  | Neurological<br>examination              | Brain MRI                                                                             | OFC<br>(cm)                                                     | Others                           |
|-----------------------------|-----------------------------------------------------------------------------|----------------------------------------|-----------------------|----------------|-------------------------------------------------|--------------------------------------------------------------|------------------------------------------|---------------------------------------------------------------------------------------|-----------------------------------------------------------------|----------------------------------|
| 1<br>6 y<br>Female          | a 2.25-Mb<br>deletion<br>(including<br><i>SPTANI</i> and<br><i>STXBP1</i> ) | Tonic<br>seizure<br>Oral<br>automatism | 1.5 m                 | S-B            | Seizure free<br>after TRH<br>injection<br>(5 m) | Visual<br>attention<br>Oral feeding<br>No head<br>control    | Profound MR<br>Hypotonic<br>quadriplegia | Slightly<br>decreased WM<br>(at 4 y)                                                  | 31<br>(-1.6 SD,<br>at birth)<br>41.3<br>(-3.9 SD,<br>at 23 m)   |                                  |
| 2<br>7 y<br>Female          | c.6619_6621del<br>(p.E2207del)                                              | No visual<br>attention                 | 3 m                   | Hyps           | Intractable                                     | No visual<br>attention<br>Gastrostomy<br>No head<br>control  | Profound MR<br>Spastic<br>quadriplegia   | Cortical atrophy<br>Decreased WM<br>Cerebellum<br>& BS atrophy<br>Thin CC<br>(at 6 y) | 31.5<br>(-1.2 SD,<br>at birth)<br>44.4<br>(-2.4 SD,<br>at 35 m) | GE<br>reflux                     |
| 3<br>Died at<br>3 y<br>Male | c.6923_6928dup<br>(p.R2308_M2309<br>dup)                                    | No visual<br>attention                 | 3 m                   | Hyps           | Intractable                                     | No visual<br>attention<br>Tube feeding<br>No head<br>control | Profound MR<br>Spastic<br>quadriplegia   | Cortical atrophy<br>Decreased WM<br>Cerebellum<br>& BS atrophy<br>Thin CC<br>(at 3 y) | 33<br>(-0.4 SD,<br>at birth)<br>42.4<br>(-4.8 SD,<br>at 36 m)   | GE<br>reflux<br>Myo-<br>carditis |

y, year(s); m, month(s); EEG, electroencephalogram; S-B, suppression-burst; Hyps, hypsarrhythmia; TRH, thyrotropin-releasing hormone; MR, mental retardation; MRI, magnetic resonance imaging; WM, white matter; BS, brain stem; CC, corpus callosum; OFC, occipitofrontal circumference; SD, standard deviation; GE, gastroesophageal.

**Table S2. PCR conditions and primer sequences**

|      | size (bp) | orientation | primer sequence (5'-3')   | Annealing (°C) | Extension (°C) |
|------|-----------|-------------|---------------------------|----------------|----------------|
| Ex2  | 338       | Forward     | CATCTATTTTGGTGCCTATTGGT   | 56             | 68             |
|      |           | Reverse     | TTTGGGCTCTTGAATTTTGG      |                |                |
| Ex3  | 231       | Forward     | ATGCTGATGCTGTGTGGTTG      | 56             | 68             |
|      |           | Reverse     | TACAATGCTCCACCCAGATG      |                |                |
| Ex4  | 249       | Forward     | CCCACAGAGCCAGTTGTGAT      | 56             | 68             |
|      |           | Reverse     | GGAGTCTCTTCCCTTTTCTTTGA   |                |                |
| Ex5  | 248       | Forward     | TGTTTCTGGAAGCCATTGTT      | 56             | 68             |
|      |           | Reverse     | TGTTGTGAGAAGCATAACAGCA    |                |                |
| Ex6  | 233       | Forward     | GTTGGAGGAGCCAGAAGTTG      | 56             | 68             |
|      |           | Reverse     | CTCCAGGTTGAGACCCATTC      |                |                |
| Ex7  | 244       | Forward     | AGGGAGTCATCATTGCTGTG      | 56             | 68             |
|      |           | Reverse     | TTCTCCTGACCTTGGTAACTT     |                |                |
| Ex8  | 269       | Forward     | AAGTTACCAAGGGTCAGGAGAA    | 56             | 68             |
|      |           | Reverse     | TCTGCTATTCCTGCTTCCAAA     |                |                |
| Ex9  | 250       | Forward     | AACCTCCGCTGAAACATAA       | 56             | 68             |
|      |           | Reverse     | CCCAACACTGATAAACTGGTG     |                |                |
| Ex10 | 250       | Forward     | TGTAAGATGCTGGGCACAAA      | 56             | 68             |
|      |           | Reverse     | GGTGAATGCGTTCTCTGGAT      |                |                |
| Ex11 | 239       | Forward     | ATTGGGGCTGACCTCATCT       | 60             | 72             |
|      |           | Reverse     | CAAAACACAGGCCCTTCTTC      |                |                |
| Ex12 | 235       | Forward     | ACCCTTTGCTTCACAGTCTTAG    | 56             | 68             |
|      |           | Reverse     | TCTGGCTTACTATAAGGGTCATTTG |                |                |
| Ex13 | 222       | Forward     | CAAGCTTGGGACTAGTGTGCT     | 56             | 68             |
|      |           | Reverse     | GGGATATCCAGTTGAAGAGACTT   |                |                |
| Ex14 | 275       | Forward     | TGGATATCCCTTTGGGAGTG      | 56             | 68             |
|      |           | Reverse     | TTTGTGAGAGCTGTGTTTAGCTT   |                |                |
| Ex15 | 317       | Forward     | GGGAACTTGACGTTCTCAGG      | 56             | 68             |
|      |           | Reverse     | AAGGGGTATTTAGTTCCCCAAA    |                |                |
| Ex16 | 292       | Forward     | ACTGTTTCATGGGCAGTGTTG     | 56             | 68             |
|      |           | Reverse     | GCATTCACCTTGCCCAACC       |                |                |

|      |     |         |                           |    |    |
|------|-----|---------|---------------------------|----|----|
| Ex17 | 344 | Forward | CGATAAAACCACACCCAAAG      | 56 | 68 |
|      |     | Reverse | TAGCACAGCCTTTCCCAAGT      |    |    |
| Ex18 | 245 | Forward | CTGGAACCATGGTGGTAGC       | 56 | 68 |
|      |     | Reverse | CACCAAGCCATGTCACTGAT      |    |    |
| Ex19 | 398 | Forward | AGTGCCGTGAACACACAGAG      | 56 | 68 |
|      |     | Reverse | CGCGCATCACTACTTCTCCT      |    |    |
| Ex20 | 226 | Forward | GGAGGATGGGAGGCTTCAG       | 56 | 68 |
|      |     | Reverse | TGATAGGAACACCTGCTGACA     |    |    |
| Ex21 | 293 | Forward | TGGCATTTGAATCTGCTCTG      | 56 | 68 |
|      |     | Reverse | CAACCCACAGAAACCCAACT      |    |    |
| Ex22 | 276 | Forward | TCCTTGGATTCTCCCTCTCA      | 56 | 68 |
|      |     | Reverse | GGCCCATGTGGAACAGAGTA      |    |    |
| Ex23 | 248 | Forward | CCAACATTAAGCATCCACCA      | 56 | 68 |
|      |     | Reverse | CTTCAAGAGAAGCGGCAGAG      |    |    |
| Ex24 | 294 | Forward | GCTAACTGCCTTCCTTGTCC      | 56 | 68 |
|      |     | Reverse | TCAAATCTTTAAACAAATTTTCAGC |    |    |
| Ex25 | 250 | Forward | TCCTTTGACTTTGGCTTGCT      | 56 | 68 |
|      |     | Reverse | CACTGCTTGTTGGGCTATGA      |    |    |
| Ex26 | 230 | Forward | TCCTGTGTTTCCAGGTTTGG      | 56 | 68 |
|      |     | Reverse | AAGGCATCTGAGGTTTCAGGA     |    |    |
| Ex27 | 167 | Forward | GGTGCTTTGTTTCATGGTCA      | 56 | 68 |
|      |     | Reverse | GGCACACCAGAAAAGGACAT      |    |    |
| Ex28 | 220 | Forward | CAATGACACTTGACAGCTCAGA    | 56 | 68 |
|      |     | Reverse | ACCCGGTTGACAAGAACAAG      |    |    |
| Ex29 | 248 | Forward | ATGCCCTAGCATCTCCTTCA      | 60 | 72 |
|      |     | Reverse | GGAAACCAGCAGTCACCTGT      |    |    |
| Ex30 | 250 | Forward | TAATCAAGGCAGTTGTACTIONGG  | 56 | 68 |
|      |     | Reverse | CTCTTTCTGGGGCAAAAATG      |    |    |
| Ex31 | 289 | Forward | TGCAGAGCATACCCCTTAC       | 56 | 68 |
|      |     | Reverse | GACCCCTACAAAGAAGGCTCT     |    |    |
| Ex32 | 247 | Forward | TGTTTTCTGGGCAGAAGAT       | 56 | 68 |
|      |     | Reverse | ACAAAGGGTGGGAATGAGG       |    |    |
| Ex33 | 288 | Forward | GGCATCTGCTGCCAGTTAC       | 56 | 68 |
|      |     | Reverse | CCCTTCAGCAAGGAAACACT      |    |    |



|      |     |         |                         |    |    |
|------|-----|---------|-------------------------|----|----|
| Ex34 | 245 | Forward | CTTGCTGAAGGGCCTCATT     | 56 | 68 |
|      |     | Reverse | GATGTCAATCAGGAAAAATCCA  |    |    |
| Ex35 | 285 | Forward | CCTGCCACCAGCTAGTTCTC    | 60 | 72 |
|      |     | Reverse | GCCTTCGTATGAGGGGATG     |    |    |
| Ex36 | 327 | Forward | GTCTCCCCACTTCCTTCTCC    | 56 | 68 |
|      |     | Reverse | TGGGTGCAAGGAGATTGTTT    |    |    |
| Ex37 | 243 | Forward | GTCCCAAATGCTGAGCTTC     | 56 | 68 |
|      |     | Reverse | TGAAGAGACACCAGCAAACC    |    |    |
| Ex38 | 248 | Forward | CCTTCCCCCTGAAAAGACAT    | 56 | 68 |
|      |     | Reverse | GTGACGGTGGTCATCTTCCT    |    |    |
| Ex39 | 250 | Forward | GAGAGGGACGATTCTTCATAGA  | 56 | 68 |
|      |     | Reverse | TGTGCCAAATGACTAGAAATCC  |    |    |
| Ex40 | 247 | Forward | CCACTGGGCAACCTGAATTT    | 56 | 68 |
|      |     | Reverse | CCTTAGGAGTCAGGCAGAGC    |    |    |
| Ex41 | 348 | Forward | GCAGATAGCTGTGGGAGACC    | 60 | 72 |
|      |     | Reverse | GCCTCACCACTCAACAGTCA    |    |    |
| Ex42 | 248 | Forward | CCACAGTTGACCTGATGTCC    | 60 | 72 |
|      |     | Reverse | GGCCCACTCAAACACCTCT     |    |    |
| Ex43 | 236 | Forward | CTGGGAGCTTCGAGACAGAA    | 60 | 72 |
|      |     | Reverse | CTGGCCTTCCACTTGTTCC     |    |    |
| Ex44 | 240 | Forward | TCACAATCAAAGCTGGAGGA    | 56 | 68 |
|      |     | Reverse | AGGCAGTTGCCAAGAGAGAA    |    |    |
| Ex45 | 220 | Forward | AATAGTGTGCCTTGGCTGCT    | 56 | 68 |
|      |     | Reverse | TCCCAGGAAGTGAAC'TTTGG   |    |    |
| Ex46 | 295 | Forward | CTTCCAGGGAGGGCATAGT     | 56 | 68 |
|      |     | Reverse | ACGGAAGGAGACAAAGAGCA    |    |    |
| Ex47 | 199 | Forward | CCTTTCTAATCCATCTCCACTGA | 56 | 68 |
|      |     | Reverse | GCCACCAGTCATCTCACAGA    |    |    |
| Ex48 | 299 | Forward | TCCAGTCCTGTGGAGTCACC    | 60 | 72 |
|      |     | Reverse | GAGCTGTGGGCCAGCTAAG     |    |    |
| Ex49 | 434 | Forward | CACCCACCTCCTGCACT       | 60 | 72 |
|      |     | Reverse | CTGAGCAGGGCCAGAGA       |    |    |
| Ex50 | 247 | Forward | TGAGCCCATCTGTGAAGGA     | 60 | 72 |
|      |     | Reverse | CCCAGGGCTTAAGTACAGCA    |    |    |

|      |     |         |                        |    |    |
|------|-----|---------|------------------------|----|----|
| Ex51 | 115 | Forward | GTCCGGACACCACCTTGT     | 56 | 68 |
|      |     | Reverse | ACGAGACCCCCACATGAC     |    |    |
| Ex52 | 227 | Forward | CCAGGCATTGCTCTCTCTG    | 60 | 72 |
|      |     | Reverse | TTTAAGCCAGGAAGGGAAGG   |    |    |
| Ex53 | 330 | Forward | CTCCTGGGCTGGTACTG      | 60 | 72 |
|      |     | Reverse | CACAGCAGGTGACTGTGTCTT  |    |    |
| Ex54 | 213 | Forward | TGCTGTGTGGAGGTCTGT     | 56 | 68 |
|      |     | Reverse | CCTGCCAGACTTGTCTTGT    |    |    |
| Ex55 | 300 | Forward | GCCCTCAAAGAATTCAGCAT   | 60 | 72 |
|      |     | Reverse | GGCAGAGGCTCACAGCAC     |    |    |
| Ex56 | 283 | Forward | AATTAAGGCCAGGTGCTGTG   | 56 | 68 |
|      |     | Reverse | TTGGCTTTAGTTTTCCAAAGGA |    |    |
| Ex57 | 260 | Forward | GAGGTCGGGTTTGAAGTGG    | 60 | 72 |
|      |     | Reverse | CACACAGAGGAGCGGACAT    |    |    |

### Cycling conditions

95°C 1 min

95°C 10 sec

56 / 60°C 20 sec

68 / 72°C 20 sec

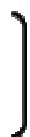

\* PCR cycles are determined by monitoring realtime PCR

**Table S3. Electrophysiological parameters recorded from cultured cortical neurons expressing either wt or mutant  $\alpha$ -II spectrin**

|                                                            | wt -Flag                         | del mut -Flag                    | dup mut -Flag                    | p value              |
|------------------------------------------------------------|----------------------------------|----------------------------------|----------------------------------|----------------------|
| Resting membrane potential (mV)                            | -61.8 $\pm$ 0.7 (7)              | -59.7 $\pm$ 1.0 (9)              | -58.5 $\pm$ 2.1 (7)              | 0.48                 |
| Input resistance (M $\Omega$ )                             | 547.7 $\pm$ 104.9 (7)            | 497.2 $\pm$ 84 (9)               | 568.7 $\pm$ 79 (7)               | 0.83                 |
| Whole cell capacitance (pF)                                | 33.6 $\pm$ 3.2 (7) <sup>a</sup>  | 28.0 $\pm$ 5.8 (9) <sup>a</sup>  | 29.1 $\pm$ 4.0 (7) <sup>a</sup>  | 0.70                 |
|                                                            | 41.2 $\pm$ 5.0 (11) <sup>b</sup> | 52.3 $\pm$ 4.5 (10) <sup>b</sup> | 39.2 $\pm$ 7.0 (10) <sup>b</sup> | 0.26                 |
| Action potential threshold (mV)                            | -37.9 $\pm$ 0.7 (7)              | -21.9 $\pm$ 1.4 (9)              | -23.9 $\pm$ 1.8 (7)              | <0.0001 <sup>c</sup> |
| Peak sodium current density in activation protocol (pA/pF) | 79.0 $\pm$ 16.2 (11)             | 32.7 $\pm$ 5.0 (10)              | 40.2 $\pm$ 8.3 (10)              | 0.016 <sup>d</sup>   |
| 10-90% Rise time of the sodium current (ms)                | 1.07 $\pm$ 0.08 (11)             | 1.12 $\pm$ 0.12 (10)             | 1.02 $\pm$ 0.11 (10)             | 0.79                 |

All data are given as mean  $\pm$  SEM (number of cells). p value was calculated by one-way ANOVA.

<sup>a</sup> whole cell capacitance evaluated in the current clamp recording.

<sup>b</sup> whole cell capacitance evaluated in the voltage clamp recording.,

<sup>c</sup> Results of post-hoc analysis: wt vs. del mut, p < 0.001; wt vs. dup mut, p < 0.001.

<sup>d</sup> Results of post-hoc analysis: wt vs. del mut, p < 0.05; wt vs. dup mut, p < 0.05.
